# Supplementary material
Source: PubMed Central journal article supplement (PMC2806064)
Supplement: NIHMS135781-supplement-1_si_001.pdf [file NIHMS135781-supplement-1_si_001.pdf]

## Supporting Information

# Through-Space Effects of Substituents Dominate Molecular Electrostatic Potentials of Substituted Arenes

Steven E. Wheeler\* and K. N. Houk\*  
*Department of Chemistry and Biochemistry*  
*University of California, Los Angeles, CA 90095*  
Email: [swhee2@chem.ucla.edu](mailto:swhee2@chem.ucla.edu)  
Email: [houk@chem.ucla.edu](mailto:houk@chem.ucla.edu)

| <b>Contents</b>                                                                    | <b>Page</b> |
|------------------------------------------------------------------------------------|-------------|
| Figure S1. HF, B3LYP, and MP2 ESPs for C <sub>6</sub> H <sub>5</sub> CN            | S2          |
| Figure S2. Constrained and fully relaxed ESPs for C <sub>6</sub> H <sub>5</sub> CN | S2          |
| Cartesian Coordinates of optimized geometries:                                     |             |
| Monosubstituted Benzenes                                                           | S3          |
| Polysubstituted Benzenes                                                           | S11         |
| Cryptolepines                                                                      | S13         |
| Klärner Guest Molecules                                                            | S14         |
| Supramolecular Synthons                                                            | S17         |

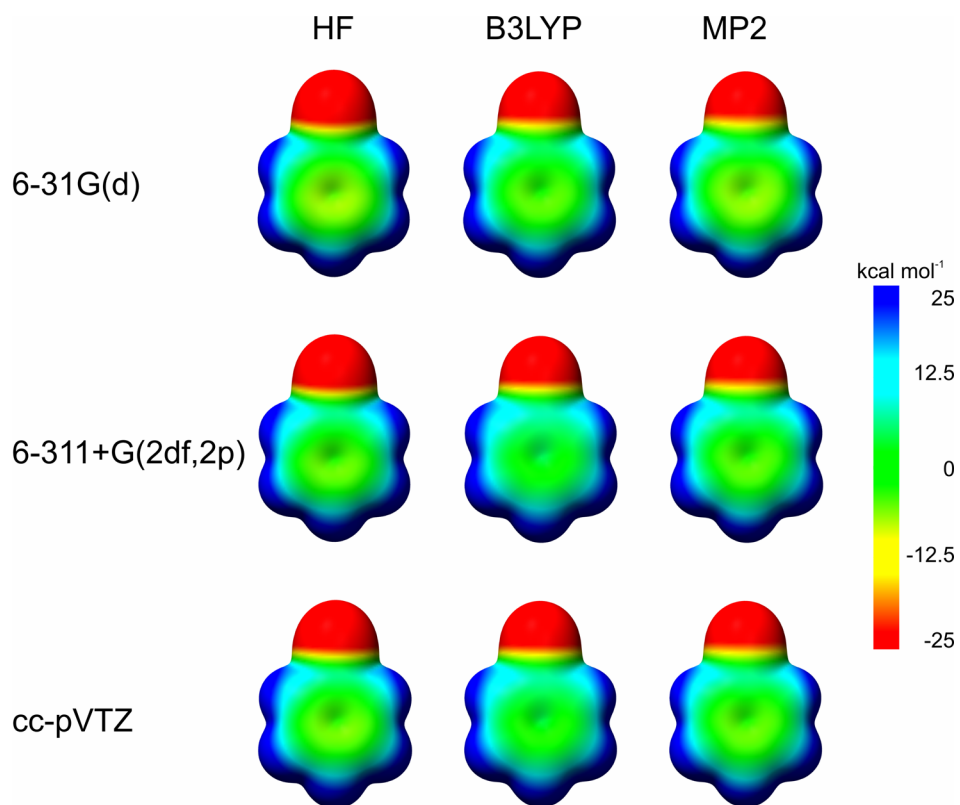

Figure S1. ESP plots for cyanobenzene at various levels of theory mapped onto the corresponding electron density isosurfaces ( $0.001 \text{ e/au}^3$ ).

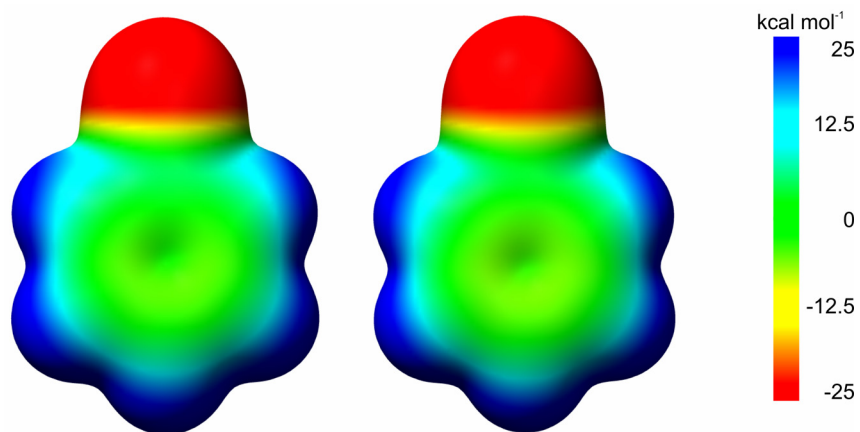

Figure S2. B3LYP/6-31G(d) ESP plots for cyanobenzene at the constrained geometry (left, carbons and hydrogens fixed at their corresponding positions in benzene) and the fully relaxed geometry (right), mapped onto the corresponding electron density isosurfaces ( $0.001 \text{ e/au}^3$ ).

## Optimized Cartesian Coordinates (Angstrom)

### Monosubstituted Benzenes

14  
C6H5BF2

|   |            |            |            |
|---|------------|------------|------------|
| C | 0.0000000  | 1.3937980  | 0.0000000  |
| C | 1.2070640  | 0.6968990  | 0.0000000  |
| C | -1.2070640 | 0.6968990  | 0.0000000  |
| C | 0.0000000  | -1.3937980 | 0.0000000  |
| C | -1.2070640 | -0.6968990 | 0.0000000  |
| C | 1.2070640  | -0.6968990 | 0.0000000  |
| H | 2.1451990  | 1.2385310  | 0.0000000  |
| H | 2.1451990  | -1.2385310 | 0.0000000  |
| H | 0.0000000  | -2.4770620 | 0.0000000  |
| H | -2.1451990 | -1.2385310 | 0.0000000  |
| H | -2.1451990 | 1.2385310  | 0.0000000  |
| B | 0.0000000  | 2.9418060  | -0.0001520 |
| F | 1.1325220  | 3.6403670  | -0.0003410 |
| F | -1.1325220 | 3.6403670  | -0.0003410 |

4  
HBF2 as in C6H5BF2

|   |            |           |            |
|---|------------|-----------|------------|
| H | 0.0000000  | 1.7539420 | 0.0001180  |
| B | 0.0000000  | 2.9418060 | -0.0001520 |
| F | 1.1325220  | 3.6403670 | -0.0003410 |
| F | -1.1325220 | 3.6403670 | -0.0003410 |

14  
C6H5CCH

|   |            |            |           |
|---|------------|------------|-----------|
| C | 0.0000000  | 1.3937980  | 0.0000000 |
| C | 1.2070640  | 0.6968990  | 0.0000000 |
| C | -1.2070640 | 0.6968990  | 0.0000000 |
| C | 0.0000000  | -1.3937980 | 0.0000000 |
| C | -1.2070640 | -0.6968990 | 0.0000000 |
| C | 1.2070640  | -0.6968990 | 0.0000000 |
| H | 2.1451990  | 1.2385310  | 0.0000000 |
| H | 2.1451990  | -1.2385310 | 0.0000000 |
| H | 0.0000000  | -2.4770620 | 0.0000000 |
| H | -2.1451990 | -1.2385310 | 0.0000000 |
| H | -2.1451990 | 1.2385310  | 0.0000000 |
| C | 0.0000000  | 2.8271110  | 0.0000000 |
| C | 0.0000000  | 4.0368540  | 0.0000000 |
| H | 0.0000000  | 5.1031920  | 0.0000000 |

5  
HCCH as in C6H5CCH

|   |           |           |           |
|---|-----------|-----------|-----------|
| H | 0.0000000 | 1.7602190 | 0.0000000 |
| C | 0.0000000 | 2.8271110 | 0.0000000 |
| C | 0.0000000 | 4.0368540 | 0.0000000 |
| H | 0.0000000 | 5.1031920 | 0.0000000 |

15  
C6H5CF3

|   |            |            |            |
|---|------------|------------|------------|
| C | 0.0000000  | 1.3937980  | 0.0000000  |
| C | 1.2070640  | 0.6968990  | 0.0000000  |
| C | -1.2070640 | 0.6968990  | 0.0000000  |
| C | 0.0000000  | -1.3937980 | 0.0000000  |
| C | -1.2070640 | -0.6968990 | 0.0000000  |
| C | 1.2070640  | -0.6968990 | 0.0000000  |
| H | 2.1451990  | 1.2385310  | 0.0000000  |
| H | 2.1451990  | -1.2385310 | 0.0000000  |
| H | 0.0000000  | -2.4770620 | 0.0000000  |
| H | -2.1451990 | -1.2385310 | 0.0000000  |
| H | -2.1451990 | 1.2385310  | 0.0000000  |
| C | -0.0000070 | 2.8970100  | 0.0637840  |
| F | -1.0902960 | 3.4276100  | -0.5346890 |
| F | 0.0000000  | 3.3435180  | 1.3418350  |
| F | 1.0903280  | 3.4276270  | -0.5347240 |

5  
HCF3 as in C6H5CF3

|   |            |           |            |
|---|------------|-----------|------------|
| H | 0.0000130  | 1.8073230 | 0.0132430  |
| C | -0.0000070 | 2.8970100 | 0.0637840  |
| F | -1.0902960 | 3.4276100 | -0.5346890 |
| F | 0.0000000  | 3.3435180 | 1.3418350  |
| F | 1.0903280  | 3.4276270 | -0.5347240 |

16  
C6H5CH2OH

|   |            |            |            |
|---|------------|------------|------------|
| C | 0.0000000  | 1.3937980  | 0.0000000  |
| C | 1.2070640  | 0.6968990  | 0.0000000  |
| C | -1.2070640 | 0.6968990  | 0.0000000  |
| C | 0.0000000  | -1.3937980 | 0.0000000  |
| C | -1.2070640 | -0.6968990 | 0.0000000  |
| C | 1.2070640  | -0.6968990 | 0.0000000  |
| H | 2.1451990  | 1.2385310  | 0.0000000  |
| H | 2.1451990  | -1.2385310 | 0.0000000  |
| H | 0.0000000  | -2.4770620 | 0.0000000  |
| H | -2.1451990 | -1.2385310 | 0.0000000  |
| H | -2.1451990 | 1.2385310  | 0.0000000  |
| C | 0.0047160  | 2.9130060  | 0.0327040  |
| H | 0.1143770  | 3.2707700  | 1.0636620  |
| H | -0.9612540 | 3.2951270  | -0.3352670 |
| O | 1.0942290  | 3.4977510  | -0.6706660 |
| H | 1.0576040  | 3.1662940  | -1.5821600 |

6  
HCH2OH as in C6H5CH2OH

|   |            |           |            |
|---|------------|-----------|------------|
| H | 0.0080630  | 1.8141870 | 0.0194620  |
| C | 0.0047160  | 2.9130060 | 0.0327040  |
| H | 0.1143770  | 3.2707700 | 1.0636620  |
| H | -0.9612540 | 3.2951270 | -0.3352670 |
| O | 1.0942290  | 3.4977510 | -0.6706660 |
| H | 1.0576040  | 3.1662940 | -1.5821600 |

15  
C6H5CH3

|   |            |            |            |
|---|------------|------------|------------|
| C | 0.0000000  | 1.3937980  | 0.0000000  |
| C | 1.2070640  | 0.6968990  | 0.0000000  |
| C | -1.2070640 | 0.6968990  | 0.0000000  |
| C | 0.0000000  | -1.3937980 | 0.0000000  |
| C | -1.2070640 | -0.6968990 | 0.0000000  |
| C | 1.2070640  | -0.6968990 | 0.0000000  |
| H | 2.1451990  | 1.2385310  | 0.0000000  |
| H | 2.1451990  | -1.2385310 | 0.0000000  |
| H | 0.0000000  | -2.4770620 | 0.0000000  |
| H | -2.1451990 | -1.2385310 | 0.0000000  |
| H | -2.1451990 | 1.2385310  | 0.0000000  |
| C | -0.0000260 | 2.9088660  | 0.0321440  |
| H | -0.8849560 | 3.3221760  | -0.4640200 |
| H | -0.0019270 | 3.2848340  | 1.0643490  |
| H | 0.8867330  | 3.3221300  | -0.4607670 |

5  
HCH3 as in C6H5CH3

|   |            |           |            |
|---|------------|-----------|------------|
| H | -0.0000050 | 1.8181880 | 0.0058740  |
| C | -0.0000260 | 2.9088660 | 0.0321440  |
| H | -0.8849560 | 3.3221760 | -0.4640200 |
| H | -0.0019270 | 3.2848340 | 1.0643490  |
| H | 0.8867330  | 3.3221300 | -0.4607670 |

14  
C6H5CHO

|   |            |            |           |
|---|------------|------------|-----------|
| C | 0.0000000  | 1.3937980  | 0.0000000 |
| C | 1.2070640  | 0.6968990  | 0.0000000 |
| C | -1.2070640 | 0.6968990  | 0.0000000 |
| C | 0.0000000  | -1.3937980 | 0.0000000 |
| C | -1.2070640 | -0.6968990 | 0.0000000 |
| C | 1.2070640  | -0.6968990 | 0.0000000 |
| H | 2.1451990  | 1.2385310  | 0.0000000 |
| H | 2.1451990  | -1.2385310 | 0.0000000 |
| H | 0.0000000  | -2.4770620 | 0.0000000 |
| H | -2.1451990 | -1.2385310 | 0.0000000 |
| H | -2.1451990 | 1.2385310  | 0.0000000 |
| C | -0.0064860 | 2.8750990  | 0.0000000 |
| O | 0.9884610  | 3.5737970  | 0.0000000 |
| H | -1.0220320 | 3.3328560  | 0.0000000 |

4  
HCHO as in C6H5CHO

|   |            |           |           |
|---|------------|-----------|-----------|
| H | 0.0375800  | 1.7673310 | 0.0000000 |
| C | -0.0064860 | 2.8750990 | 0.0000000 |
| O | 0.9884610  | 3.5737970 | 0.0000000 |
| H | -1.0220320 | 3.3328560 | 0.0000000 |

13  
C6H5CN

|   |            |            |           |
|---|------------|------------|-----------|
| C | 0.0000000  | 1.3937980  | 0.0000000 |
| C | 1.2070640  | 0.6968990  | 0.0000000 |
| C | -1.2070640 | 0.6968990  | 0.0000000 |
| C | 0.0000000  | -1.3937980 | 0.0000000 |
| C | -1.2070640 | -0.6968990 | 0.0000000 |
| C | 1.2070640  | -0.6968990 | 0.0000000 |
| H | 2.1451990  | 1.2385310  | 0.0000000 |
| H | 2.1451990  | -1.2385310 | 0.0000000 |
| H | 0.0000000  | -2.4770620 | 0.0000000 |
| H | -2.1451990 | -1.2385310 | 0.0000000 |
| H | -2.1451990 | 1.2385310  | 0.0000000 |
| C | 0.0000000  | 2.8298550  | 0.0000000 |
| N | 0.0000000  | 3.9930500  | 0.0000000 |

3  
HCN as in C6H5CN

|   |           |           |           |
|---|-----------|-----------|-----------|
| H | 0.0000000 | 1.7591240 | 0.0000000 |
| C | 0.0000000 | 2.8298550 | 0.0000000 |
| N | 0.0000000 | 3.9930500 | 0.0000000 |

17  
C6H5COCH3

|   |            |            |            |
|---|------------|------------|------------|
| C | 0.0000000  | 1.3937980  | 0.0000000  |
| C | 1.2070640  | 0.6968990  | 0.0000000  |
| C | -1.2070640 | 0.6968990  | 0.0000000  |
| C | 0.0000000  | -1.3937980 | 0.0000000  |
| C | -1.2070640 | -0.6968990 | 0.0000000  |
| C | 1.2070640  | -0.6968990 | 0.0000000  |
| H | 2.1451990  | 1.2385310  | 0.0000000  |
| H | 2.1451990  | -1.2385310 | 0.0000000  |
| H | 0.0000000  | -2.4770620 | 0.0000000  |
| H | -2.1451990 | -1.2385310 | 0.0000000  |
| H | -2.1451990 | 1.2385310  | 0.0000000  |
| C | 0.0602610  | 2.8952860  | 0.0000000  |
| O | 1.1353560  | 3.4752140  | -0.0000230 |
| C | -1.2391440 | 3.6864090  | -0.0000250 |
| H | -1.8456580 | 3.4528640  | -0.8834060 |
| H | -1.8456710 | 3.4528970  | 0.8833560  |
| H | -0.9974190 | 4.7505440  | -0.0000420 |

7  
HCOCH3 as in C6H5COCH3

|   |            |           |           |
|---|------------|-----------|-----------|
| H | -0.0076280 | 1.7874280 | 0.0000440 |
| C | 0.0602610  | 2.8952860 | 0.0000000 |

|   |            |           |            |
|---|------------|-----------|------------|
| O | 1.1353560  | 3.4752140 | -0.0000230 |
| C | -1.2391440 | 3.6864090 | -0.0000250 |
| H | -1.8456580 | 3.4528640 | -0.8834060 |
| H | -1.8456710 | 3.4528970 | 0.8833560  |
| H | -0.9974190 | 4.7505440 | -0.0000420 |

18  
C6H5COOCH3

|   |            |            |            |
|---|------------|------------|------------|
| C | 0.0000000  | 1.3937980  | 0.0000000  |
| C | 1.2070640  | 0.6968990  | 0.0000000  |
| C | -1.2070640 | 0.6968990  | 0.0000000  |
| C | 0.0000000  | -1.3937980 | 0.0000000  |
| C | -1.2070640 | -0.6968990 | 0.0000000  |
| C | 1.2070640  | -0.6968990 | 0.0000000  |
| H | 2.1451990  | 1.2385310  | 0.0000000  |
| H | 2.1451990  | -1.2385310 | 0.0000000  |
| H | 0.0000000  | -2.4770620 | 0.0000000  |
| H | -2.1451990 | -1.2385310 | 0.0000000  |
| H | -2.1451990 | 1.2385310  | 0.0000000  |
| C | 0.0608800  | 2.8843640  | -0.0000070 |
| O | 1.0891290  | 3.5324730  | 0.0000200  |
| O | -1.1679300 | 3.4531140  | -0.0000180 |
| C | -1.1770370 | 4.8882740  | 0.0001080  |
| H | -0.6734640 | 5.2764120  | -0.8893690 |
| H | -2.2296180 | 5.1733740  | 0.0004750  |
| H | -0.6728530 | 5.2762750  | 0.8892920  |

8  
HCOOCH3 as in C6H5COOCH3

|   |            |           |            |
|---|------------|-----------|------------|
| H | -0.0265620 | 1.7900100 | 0.0000180  |
| C | 0.0608800  | 2.8843640 | -0.0000070 |
| O | 1.0891290  | 3.5324730 | 0.0000200  |
| O | -1.1679300 | 3.4531140 | -0.0000180 |
| C | -1.1770370 | 4.8882740 | 0.0001080  |
| H | -0.6734640 | 5.2764120 | -0.8893690 |
| H | -2.2296180 | 5.1733740 | 0.0004750  |
| H | -0.6728530 | 5.2762750 | 0.8892920  |

15  
C6H5COOH

|   |            |            |           |
|---|------------|------------|-----------|
| C | 0.0000000  | 1.3937980  | 0.0000000 |
| C | 1.2070640  | 0.6968990  | 0.0000000 |
| C | -1.2070640 | 0.6968990  | 0.0000000 |
| C | 0.0000000  | -1.3937980 | 0.0000000 |
| C | -1.2070640 | -0.6968990 | 0.0000000 |
| C | 1.2070640  | -0.6968990 | 0.0000000 |

|   |            |            |            |
|---|------------|------------|------------|
| H | 2.1451990  | 1.2385310  | 0.0000000  |
| H | 2.1451990  | -1.2385310 | 0.0000000  |
| H | 0.0000000  | -2.4770620 | 0.0000000  |
| H | -2.1451990 | -1.2385310 | 0.0000000  |
| H | -2.1451990 | 1.2385310  | 0.0000000  |
| C | 0.0561190  | 2.8802480  | -0.0000240 |
| O | 1.0766480  | 3.5395660  | 0.0005630  |
| O | -1.1727430 | 3.4605160  | -0.0008360 |
| H | -1.0073640 | 4.4213910  | -0.0009240 |

5

HCOOH as in C6H5COOH

|   |            |           |            |
|---|------------|-----------|------------|
| H | -0.0260310 | 1.7865490 | 0.0001220  |
| C | 0.0561190  | 2.8802480 | -0.0000240 |
| O | 1.0766480  | 3.5395660 | 0.0005630  |
| O | -1.1727430 | 3.4605160 | -0.0008360 |
| H | -1.0073640 | 4.4213910 | -0.0009240 |

12

C6H5F

|   |            |            |           |
|---|------------|------------|-----------|
| C | 0.0000000  | 1.3937980  | 0.0000000 |
| C | 1.2070640  | 0.6968990  | 0.0000000 |
| C | -1.2070640 | 0.6968990  | 0.0000000 |
| C | 0.0000000  | -1.3937980 | 0.0000000 |
| C | -1.2070640 | -0.6968990 | 0.0000000 |
| C | 1.2070640  | -0.6968990 | 0.0000000 |
| F | 0.0000000  | 2.7401870  | 0.0000000 |
| H | 2.1451990  | 1.2385310  | 0.0000000 |
| H | 2.1451990  | -1.2385310 | 0.0000000 |
| H | 0.0000000  | -2.4770620 | 0.0000000 |
| H | -2.1451990 | -1.2385310 | 0.0000000 |
| H | -2.1451990 | 1.2385310  | 0.0000000 |

2

HF as in C6H5F

|   |           |           |           |
|---|-----------|-----------|-----------|
| F | 0.0000000 | 2.7401870 | 0.0000000 |
| H | 0.0000000 | 1.8996520 | 0.0000000 |

20

C6H5NCH3\_2

|   |            |            |            |
|---|------------|------------|------------|
| C | 0.0000000  | 1.3937980  | 0.0000000  |
| C | 1.2070640  | 0.6968990  | 0.0000000  |
| C | -1.2070640 | 0.6968990  | 0.0000000  |
| C | 0.0000000  | -1.3937980 | 0.0000000  |
| C | -1.2070640 | -0.6968990 | 0.0000000  |
| C | 1.2070640  | -0.6968990 | 0.0000000  |
| H | 2.1451990  | 1.2385310  | 0.0000000  |
| H | 2.1451990  | -1.2385310 | 0.0000000  |
| H | 0.0000000  | -2.4770620 | 0.0000000  |
| H | -2.1451990 | -1.2385310 | 0.0000000  |
| H | -2.1451990 | 1.2385310  | 0.0000000  |
| N | -0.0000990 | 2.7966770  | -0.0247350 |
| C | -1.2417630 | 3.5106360  | 0.2150510  |
| H | -1.0495560 | 4.5847550  | 0.1736570  |
| H | -1.9857750 | 3.2834960  | -0.5584130 |
| H | -1.6920130 | 3.2800190  | 1.1951200  |
| C | 1.2418460  | 3.5109540  | 0.2125110  |
| H | 1.6932550  | 3.2821060  | 1.1924950  |
| H | 1.9848870  | 3.2823680  | -0.5614010 |
| H | 1.0496580  | 4.5850100  | 0.1693120  |

10

HNCH3\_2 as in C6H5NCH3\_2

|   |            |           |            |
|---|------------|-----------|------------|
| H | 0.0004740  | 1.8787230 | 0.4019420  |
| N | -0.0000990 | 2.7966770 | -0.0247350 |
| C | -1.2417630 | 3.5106360 | 0.2150510  |
| H | -1.0495560 | 4.5847550 | 0.1736570  |
| H | -1.9857750 | 3.2834960 | -0.5584130 |
| H | -1.6920130 | 3.2800190 | 1.1951200  |
| C | 1.2418460  | 3.5109540 | 0.2125110  |
| H | 1.6932550  | 3.2821060 | 1.1924950  |
| H | 1.9848870  | 3.2823680 | -0.5614010 |
| H | 1.0496580  | 4.5850100 | 0.1693120  |

14

C6H5NH2

|   |            |            |            |
|---|------------|------------|------------|
| C | 0.0000000  | 1.3937980  | 0.0000000  |
| C | 1.2070640  | 0.6968990  | 0.0000000  |
| C | -1.2070640 | 0.6968990  | 0.0000000  |
| C | 0.0000000  | -1.3937980 | 0.0000000  |
| C | -1.2070640 | -0.6968990 | 0.0000000  |
| C | 1.2070640  | -0.6968990 | 0.0000000  |
| H | 2.1451990  | 1.2385310  | 0.0000000  |
| H | 2.1451990  | -1.2385310 | 0.0000000  |
| H | 0.0000000  | -2.4770620 | 0.0000000  |
| H | -2.1451990 | -1.2385310 | 0.0000000  |
| H | -2.1451990 | 1.2385310  | 0.0000000  |
| N | 0.0000000  | 2.7976610  | -0.0588810 |
| H | 0.8336820  | 3.2322300  | 0.3182530  |
| H | -0.8336820 | 3.2322300  | 0.3182530  |

4

HNH2 as in C6H5NH2

|   |            |           |            |
|---|------------|-----------|------------|
| H | -0.0002590 | 1.8367180 | 0.2770250  |
| N | 0.0000000  | 2.7976610 | -0.0588810 |
| H | 0.8336820  | 3.2322300 | 0.3182530  |
| H | -0.8336820 | 3.2322300 | 0.3182530  |

17

C6H5NHCH3

|   |            |            |            |
|---|------------|------------|------------|
| C | 0.0000000  | 1.3937980  | 0.0000000  |
| C | 1.2070640  | 0.6968990  | 0.0000000  |
| C | -1.2070640 | 0.6968990  | 0.0000000  |
| C | 0.0000000  | -1.3937980 | 0.0000000  |
| C | -1.2070640 | -0.6968990 | 0.0000000  |
| C | 1.2070640  | -0.6968990 | 0.0000000  |
| H | 2.1451990  | 1.2385310  | 0.0000000  |
| H | 2.1451990  | -1.2385310 | 0.0000000  |
| H | 0.0000000  | -2.4770620 | 0.0000000  |
| H | -2.1451990 | -1.2385310 | 0.0000000  |
| H | -2.1451990 | 1.2385310  | 0.0000000  |
| N | 0.0339140  | 2.7922180  | -0.0403440 |
| C | -1.1311950 | 3.5896290  | 0.2919470  |
| H | -0.8416910 | 4.6439050  | 0.2989390  |
| H | -1.9115290 | 3.4695810  | -0.4686980 |
| H | -1.5721160 | 3.3414250  | 1.2720450  |
| H | 0.9054540  | 3.1811640  | 0.2936200  |

7

HNHCH3 as in C6H5NHCH3

|   |            |           |            |
|---|------------|-----------|------------|
| H | -0.0389010 | 1.8449270 | 0.3164510  |
| N | 0.0339140  | 2.7922180 | -0.0403440 |
| C | -1.1311950 | 3.5896290 | 0.2919470  |
| H | -0.8416910 | 4.6439050 | 0.2989390  |
| H | -1.9115290 | 3.4695810 | -0.4686980 |
| H | -1.5721160 | 3.3414250 | 1.2720450  |
| H | 0.9054540  | 3.1811640 | 0.2936200  |

15

C6H5NHOH

|   |            |            |            |
|---|------------|------------|------------|
| C | 0.0000000  | 1.3937980  | 0.0000000  |
| C | 1.2070640  | 0.6968990  | 0.0000000  |
| C | -1.2070640 | 0.6968990  | 0.0000000  |
| C | 0.0000000  | -1.3937980 | 0.0000000  |
| C | -1.2070640 | -0.6968990 | 0.0000000  |
| C | 1.2070640  | -0.6968990 | 0.0000000  |
| H | 2.1451990  | 1.2385310  | 0.0000000  |
| H | 2.1451990  | -1.2385310 | 0.0000000  |
| H | 0.0000000  | -2.4770620 | 0.0000000  |
| H | -2.1451990 | -1.2385310 | 0.0000000  |
| H | -2.1451990 | 1.2385310  | 0.0000000  |
| N | 0.0415130  | 2.8101550  | -0.0956680 |
| O | -1.1194670 | 3.4331810  | 0.4618720  |
| H | -1.4859330 | 3.9134550  | -0.2981910 |
| H | 0.8259380  | 3.1848810  | 0.4348330  |

5

HNHOH as in C6H5NHOH

|   |            |           |            |
|---|------------|-----------|------------|
| H | -0.0432910 | 1.8361330 | 0.2018810  |
| N | 0.0415130  | 2.8101550 | -0.0956680 |
| O | -1.1194670 | 3.4331810 | 0.4618720  |
| H | -1.4859330 | 3.9134550 | -0.2981910 |
| H | 0.8259380  | 3.1848810 | 0.4348330  |

13  
C6H5NO

|   |            |            |           |
|---|------------|------------|-----------|
| C | 0.0000000  | 1.3937980  | 0.0000000 |
| C | 1.2070640  | 0.6968990  | 0.0000000 |
| C | -1.2070640 | 0.6968990  | 0.0000000 |
| C | 0.0000000  | -1.3937980 | 0.0000000 |
| C | -1.2070640 | -0.6968990 | 0.0000000 |
| C | 1.2070640  | -0.6968990 | 0.0000000 |
| H | 2.1451990  | 1.2385310  | 0.0000000 |
| H | 2.1451990  | -1.2385310 | 0.0000000 |
| H | 0.0000000  | -2.4770620 | 0.0000000 |
| H | -2.1451990 | -1.2385310 | 0.0000000 |
| H | -2.1451990 | 1.2385310  | 0.0000000 |
| N | -0.1036370 | 2.8317190  | 0.0000000 |
| O | 0.9664440  | 3.4222230  | 0.0000000 |

3  
HNO as in C6H5NO

|   |            |           |           |
|---|------------|-----------|-----------|
| H | 0.0998230  | 1.7842180 | 0.0000000 |
| N | -0.1036370 | 2.8317190 | 0.0000000 |
| O | 0.9664440  | 3.4222230 | 0.0000000 |

14  
C6H5NO2

|   |            |            |            |
|---|------------|------------|------------|
| C | 0.0000000  | 1.3937980  | 0.0000000  |
| C | 1.2070640  | 0.6968990  | 0.0000000  |
| C | -1.2070640 | 0.6968990  | 0.0000000  |
| C | 0.0000000  | -1.3937980 | 0.0000000  |
| C | -1.2070640 | -0.6968990 | 0.0000000  |
| C | 1.2070640  | -0.6968990 | 0.0000000  |
| H | 2.1451990  | 1.2385310  | 0.0000000  |
| H | 2.1451990  | -1.2385310 | 0.0000000  |
| H | 0.0000000  | -2.4770620 | 0.0000000  |
| H | -2.1451990 | -1.2385310 | 0.0000000  |
| H | -2.1451990 | 1.2385310  | 0.0000000  |
| N | 0.0000000  | 2.8605710  | 0.0000000  |
| O | 1.0905650  | 3.4308910  | -0.0000340 |
| O | -1.0905650 | 3.4308910  | -0.0000340 |

4  
HNO2 as in C6H5NO2

|   |            |           |            |
|---|------------|-----------|------------|
| H | 0.0000000  | 1.8193500 | 0.0000250  |
| N | 0.0000000  | 2.8605710 | 0.0000000  |
| O | 1.0905650  | 3.4308910 | -0.0000340 |
| O | -1.0905650 | 3.4308910 | -0.0000340 |

16  
C6H5OCF3

|   |            |            |            |
|---|------------|------------|------------|
| C | 0.0000000  | 1.3937980  | 0.0000000  |
| C | 1.2070640  | 0.6968990  | 0.0000000  |
| C | -1.2070640 | 0.6968990  | 0.0000000  |
| C | 0.0000000  | -1.3937980 | 0.0000000  |
| C | -1.2070640 | -0.6968990 | 0.0000000  |
| C | 1.2070640  | -0.6968990 | 0.0000000  |
| H | 2.1451990  | 1.2385310  | 0.0000000  |
| H | 2.1451990  | -1.2385310 | 0.0000000  |
| H | 0.0000000  | -2.4770620 | 0.0000000  |
| H | -2.1451990 | -1.2385310 | 0.0000000  |
| H | -2.1451990 | 1.2385310  | 0.0000000  |
| O | -0.1063000 | 2.7871980  | -0.0489780 |
| C | 0.8125120  | 3.5691230  | 0.5669640  |
| F | 1.9975300  | 3.5892690  | -0.0839780 |
| F | 0.3336560  | 4.8127590  | 0.5832710  |
| F | 1.0608170  | 3.1803640  | 1.8296660  |

6  
HO CF3 as in C6H5OCF3

|   |            |           |            |
|---|------------|-----------|------------|
| H | 0.2235870  | 1.8734660 | -0.0675810 |
| O | -0.1063000 | 2.7871980 | -0.0489780 |
| C | 0.8125120  | 3.5691230 | 0.5669640  |
| F | 1.9975300  | 3.5892690 | -0.0839780 |
| F | 0.3336560  | 4.8127590 | 0.5832710  |
| F | 1.0608170  | 3.1803640 | 1.8296660  |



13  
C6H5OH

|   |            |            |           |
|---|------------|------------|-----------|
| C | 0.0000000  | 1.3937980  | 0.0000000 |
| C | 1.2070640  | 0.6968990  | 0.0000000 |
| C | -1.2070640 | 0.6968990  | 0.0000000 |
| C | 0.0000000  | -1.3937980 | 0.0000000 |
| C | -1.2070640 | -0.6968990 | 0.0000000 |
| C | 1.2070640  | -0.6968990 | 0.0000000 |
| H | 2.1451990  | 1.2385310  | 0.0000000 |
| H | 2.1451990  | -1.2385310 | 0.0000000 |
| H | 0.0000000  | -2.4770620 | 0.0000000 |
| H | -2.1451990 | -1.2385310 | 0.0000000 |
| H | -2.1451990 | 1.2385310  | 0.0000000 |
| O | -0.0622570 | 2.7623200  | 0.0000000 |
| H | 0.8405920  | 3.1165350  | 0.0000000 |

3  
HOH as in C6H5OH

|   |            |           |           |
|---|------------|-----------|-----------|
| H | 0.0690340  | 1.8025590 | 0.0000000 |
| O | -0.0622570 | 2.7623200 | 0.0000000 |
| H | 0.8405920  | 3.1165350 | 0.0000000 |

16  
C6H5OMe

|   |            |            |            |
|---|------------|------------|------------|
| C | 0.0000000  | 1.3937980  | 0.0000000  |
| C | 1.2070640  | 0.6968990  | 0.0000000  |
| C | -1.2070640 | 0.6968990  | 0.0000000  |
| C | 0.0000000  | -1.3937980 | 0.0000000  |
| C | -1.2070640 | -0.6968990 | 0.0000000  |
| C | 1.2070640  | -0.6968990 | 0.0000000  |
| H | 2.1451990  | 1.2385310  | 0.0000000  |
| H | 2.1451990  | -1.2385310 | 0.0000000  |
| H | 0.0000000  | -2.4770620 | 0.0000000  |
| H | -2.1451990 | -1.2385310 | 0.0000000  |
| H | -2.1451990 | 1.2385310  | 0.0000000  |
| O | -0.1061940 | 2.7585350  | 0.0000010  |
| C | 1.0846720  | 3.5268560  | -0.0000020 |
| H | 1.6923950  | 3.3343950  | -0.8945140 |
| H | 0.7670250  | 4.5713810  | -0.0000150 |
| H | 1.6923850  | 3.3344150  | 0.8945220  |

6  
HOMe as in C6H5OMe

|   |            |           |            |
|---|------------|-----------|------------|
| H | 0.1452590  | 1.8234540 | 0.0000050  |
| O | -0.1061940 | 2.7585350 | 0.0000010  |
| C | 1.0846720  | 3.5268560 | -0.0000020 |
| H | 1.6923950  | 3.3343950 | -0.8945140 |
| H | 0.7670250  | 4.5713810 | -0.0000150 |
| H | 1.6923850  | 3.3344150 | 0.8945220  |

16  
C6H5SCH3

|   |            |            |            |
|---|------------|------------|------------|
| C | 0.0000000  | 1.3937980  | 0.0000000  |
| C | 1.2070640  | 0.6968990  | 0.0000000  |
| C | -1.2070640 | 0.6968990  | 0.0000000  |
| C | 0.0000000  | -1.3937980 | 0.0000000  |
| C | -1.2070640 | -0.6968990 | 0.0000000  |
| C | 1.2070640  | -0.6968990 | 0.0000000  |
| H | 2.1451990  | 1.2385310  | 0.0000000  |
| H | 2.1451990  | -1.2385310 | 0.0000000  |
| H | 0.0000000  | -2.4770620 | 0.0000000  |
| H | -2.1451990 | -1.2385310 | 0.0000000  |
| H | -2.1451990 | 1.2385310  | 0.0000000  |
| S | -0.1259000 | 3.1792430  | 0.0000130  |
| C | 1.6087750  | 3.7378810  | -0.0001190 |
| H | 2.1410460  | 3.4069510  | -0.8963770 |
| H | 1.5654100  | 4.8300000  | -0.0001600 |
| H | 2.1411630  | 3.4070230  | 0.8960950  |

6  
HSCH3 as in C6H5SCH3

|   |            |           |            |
|---|------------|-----------|------------|
| H | 0.1216980  | 1.8513030 | -0.0000520 |
| S | -0.1259000 | 3.1792430 | 0.0000130  |
| C | 1.6087750  | 3.7378810 | -0.0001190 |
| H | 2.1410460  | 3.4069510 | -0.8963770 |
| H | 1.5654100  | 4.8300000 | -0.0001600 |
| H | 2.1411630  | 3.4070230 | 0.8960950  |

13  
C6H5SH

|   |            |            |           |
|---|------------|------------|-----------|
| C | 0.0000000  | 1.3937980  | 0.0000000 |
| C | 1.2070640  | 0.6968990  | 0.0000000 |
| C | -1.2070640 | 0.6968990  | 0.0000000 |
| C | 0.0000000  | -1.3937980 | 0.0000000 |
| C | -1.2070640 | -0.6968990 | 0.0000000 |
| C | 1.2070640  | -0.6968990 | 0.0000000 |
| H | 2.1451990  | 1.2385310  | 0.0000000 |
| H | 2.1451990  | -1.2385310 | 0.0000000 |
| H | 0.0000000  | -2.4770620 | 0.0000000 |
| H | -2.1451990 | -1.2385310 | 0.0000000 |
| H | -2.1451990 | 1.2385310  | 0.0000000 |
| S | -0.0800220 | 3.1837070  | 0.0000000 |
| H | 1.2502400  | 3.4061270  | 0.0000000 |

3  
HSH as in C6H5SH

|   |            |           |           |
|---|------------|-----------|-----------|
| H | 0.0777910  | 1.8432860 | 0.0000000 |
| S | -0.0800220 | 3.1837070 | 0.0000000 |
| H | 1.2502400  | 3.4061270 | 0.0000000 |

15  
C6H5SiF3

|    |            |            |            |
|----|------------|------------|------------|
| C  | 0.0000000  | 1.3937980  | 0.0000000  |
| C  | 1.2070640  | 0.6968990  | 0.0000000  |
| C  | -1.2070640 | 0.6968990  | 0.0000000  |
| C  | 0.0000000  | -1.3937980 | 0.0000000  |
| C  | -1.2070640 | -0.6968990 | 0.0000000  |
| C  | 1.2070640  | -0.6968990 | 0.0000000  |
| H  | 2.1451990  | 1.2385310  | 0.0000000  |
| H  | 2.1451990  | -1.2385310 | 0.0000000  |
| H  | 0.0000000  | -2.4770620 | 0.0000000  |
| H  | -2.1451990 | -1.2385310 | 0.0000000  |
| H  | -2.1451990 | 1.2385310  | 0.0000000  |
| Si | -0.0000140 | 3.2319900  | 0.0276110  |
| F  | -1.2988550 | 3.8001710  | -0.7058820 |
| F  | 0.0003510  | 3.8578250  | 1.4975450  |
| F  | 1.2984330  | 3.8002370  | -0.7065240 |

5  
HSiF3 as in C6H5SiF3

|    |            |           |            |
|----|------------|-----------|------------|
| H  | 0.0000250  | 1.7675610 | 0.0527750  |
| Si | -0.0000140 | 3.2319900 | 0.0276110  |
| F  | -1.2988550 | 3.8001710 | -0.7058820 |
| F  | 0.0003510  | 3.8578250 | 1.4975450  |
| F  | 1.2984330  | 3.8002370 | -0.7065240 |

15  
C6H5SiH3

|    |            |            |            |
|----|------------|------------|------------|
| C  | 0.0000000  | 1.3937980  | 0.0000000  |
| C  | 1.2070640  | 0.6968990  | 0.0000000  |
| C  | -1.2070640 | 0.6968990  | 0.0000000  |
| C  | 0.0000000  | -1.3937980 | 0.0000000  |
| C  | -1.2070640 | -0.6968990 | 0.0000000  |
| C  | 1.2070640  | -0.6968990 | 0.0000000  |
| H  | 2.1451990  | 1.2385310  | 0.0000000  |
| H  | 2.1451990  | -1.2385310 | 0.0000000  |
| H  | 0.0000000  | -2.4770620 | 0.0000000  |
| H  | -2.1451990 | -1.2385310 | 0.0000000  |
| H  | -2.1451990 | 1.2385310  | 0.0000000  |
| Si | 0.0001490  | 3.2772270  | 0.0358490  |
| H  | -1.2136080 | 3.8014840  | -0.6485020 |
| H  | 0.0001980  | 3.8116970  | 1.4274900  |
| H  | 1.2140780  | 3.8011390  | -0.6484680 |

5  
HSiH3 as in C6H5SiH3

|    |            |           |            |
|----|------------|-----------|------------|
| H  | -0.0000590 | 1.7926330 | 0.0394350  |
| Si | 0.0001490  | 3.2772270 | 0.0358490  |
| H  | -1.2136080 | 3.8014840 | -0.6485020 |
| H  | 0.0001980  | 3.8116970 | 1.4274900  |
| H  | 1.2140780  | 3.8011390 | -0.6484680 |

## Polysubstituted Benzenes

24

hexaaminobenzene

|   |            |            |            |
|---|------------|------------|------------|
| C | 0.0000000  | 1.3937980  | -0.0641980 |
| C | -1.2070640 | 0.6968990  | -0.0641980 |
| C | 1.2070640  | 0.6968990  | -0.0641980 |
| C | 0.0000000  | -1.3937980 | -0.0641980 |
| C | 1.2070640  | -0.6968990 | -0.0641980 |
| C | -1.2070640 | -0.6968990 | -0.0641980 |
| N | 0.0000000  | 2.8637980  | -0.0641980 |
| H | -0.8164970 | 3.1971310  | 0.4072070  |
| H | 0.8164970  | 3.1971310  | 0.4072070  |
| N | -2.4801220 | 1.4318980  | -0.0641980 |
| H | -3.1770450 | 0.8914580  | 0.4072070  |
| H | -2.4113350 | 2.3120300  | 0.4374470  |
| N | -2.4801220 | -1.4318980 | -0.0641980 |
| H | -2.4113350 | -2.3120300 | 0.4374470  |
| H | -3.1770450 | -0.8914580 | 0.4072070  |
| N | 0.0000000  | -2.8637980 | -0.0641980 |
| H | 0.8164970  | -3.1971310 | 0.4072070  |
| H | -0.8164970 | -3.1971310 | 0.4072070  |
| N | 2.4801220  | -1.4318980 | -0.0641980 |
| H | 3.1770450  | -0.8914580 | 0.4072070  |
| H | 2.4113350  | -2.3120300 | 0.4374470  |
| N | 2.4801220  | 1.4318980  | -0.0641980 |
| H | 2.4113350  | 2.3120300  | 0.4374470  |
| H | 3.1770450  | 0.8914580  | 0.4072070  |

24

6 HNH2 as in hexaaminobenzene

|   |            |            |            |
|---|------------|------------|------------|
| H | 0.0000000  | 1.8508490  | 0.0337050  |
| N | 0.0000000  | 2.8637980  | -0.0641980 |
| H | -0.8164970 | 3.1971310  | 0.4072070  |
| H | 0.8164970  | 3.1971310  | 0.4072070  |
| H | -1.5952670 | 0.9508160  | 0.0890810  |
| N | -2.4801220 | 1.4318980  | -0.0641980 |
| H | -3.1770450 | 0.8914580  | 0.4072070  |
| H | -2.4113350 | 2.3120300  | 0.4374470  |
| H | -1.5950280 | -0.9511110 | 0.0887440  |
| N | -2.4801220 | -1.4318980 | -0.0641980 |
| H | -2.4113350 | -2.3120300 | 0.4374470  |
| H | -3.1770450 | -0.8914580 | 0.4072070  |
| H | 0.0000000  | -1.8508490 | 0.0337050  |
| N | 0.0000000  | -2.8637980 | -0.0641980 |
| H | 0.8164970  | -3.1971310 | 0.4072070  |
| H | -0.8164970 | -3.1971310 | 0.4072070  |
| H | 1.5952670  | -0.9508160 | 0.0890810  |
| N | 2.4801220  | -1.4318980 | -0.0641980 |
| H | 3.1770450  | -0.8914580 | 0.4072070  |
| H | 2.4113350  | -2.3120300 | 0.4374470  |
| H | 1.5950280  | 0.9511110  | 0.0887440  |

|   |           |           |            |
|---|-----------|-----------|------------|
| N | 2.4801220 | 1.4318980 | -0.0641980 |
| H | 2.4113350 | 2.3120300 | 0.4374470  |
| H | 3.1770450 | 0.8914580 | 0.4072070  |

15

tricyanobenzene

|   |            |            |           |
|---|------------|------------|-----------|
| C | 0.0000000  | 1.3937980  | 0.0000000 |
| C | 1.2070640  | 0.6968990  | 0.0000000 |
| C | -1.2070640 | 0.6968990  | 0.0000000 |
| C | 0.0000000  | -1.3937980 | 0.0000000 |
| C | -1.2070640 | -0.6968990 | 0.0000000 |
| C | 1.2070640  | -0.6968990 | 0.0000000 |
| H | 2.1451990  | 1.2385310  | 0.0000000 |
| H | 0.0000000  | -2.4770620 | 0.0000000 |
| H | -2.1462430 | 1.2391560  | 0.0000000 |
| C | 0.0000190  | 2.8293840  | 0.0000000 |
| N | 0.0000370  | 3.9915530  | 0.0000000 |
| C | -2.4503500 | -1.4146550 | 0.0000000 |
| N | -3.4569280 | -1.9955470 | 0.0000000 |
| C | 2.4503600  | -1.4146380 | 0.0000000 |
| N | 3.4569470  | -1.9955140 | 0.0000000 |

9

3 HCN as in tricyanobenzene

|   |            |            |           |
|---|------------|------------|-----------|
| H | 0.0000030  | 1.7586860  | 0.0000000 |
| C | 0.0000190  | 2.8293840  | 0.0000000 |
| N | 0.0000370  | 3.9915530  | 0.0000000 |
| H | -1.5229970 | -0.8794800 | 0.0000000 |
| C | -2.4503500 | -1.4146550 | 0.0000000 |
| N | -3.4569280 | -1.9955470 | 0.0000000 |
| H | 1.5229990  | -0.8794770 | 0.0000000 |
| C | 2.4503600  | -1.4146380 | 0.0000000 |
| N | 3.4569470  | -1.9955140 | 0.0000000 |

12

hexafluorobenzene

|   |            |            |           |
|---|------------|------------|-----------|
| C | 0.0000000  | 1.3937980  | 0.0000000 |
| C | 1.2070640  | 0.6968990  | 0.0000000 |
| C | -1.2070640 | 0.6968990  | 0.0000000 |
| C | 0.0000000  | -1.3937980 | 0.0000000 |
| C | -1.2070640 | -0.6968990 | 0.0000000 |
| C | 1.2070640  | -0.6968990 | 0.0000000 |
| F | 0.0000000  | 2.7294300  | 0.0000000 |
| F | 2.3637560  | 1.3647150  | 0.0000000 |
| F | 2.3637560  | -1.3647150 | 0.0000000 |
| F | 0.0000000  | -2.7294300 | 0.0000000 |
| F | -2.3637560 | -1.3647150 | 0.0000000 |
| F | -2.3637560 | 1.3647150  | 0.0000000 |

12

6 HF as in hexafluorobenzene

|   |            |            |           |
|---|------------|------------|-----------|
| H | 0.0000000  | 1.7956700  | 0.0000000 |
| F | 0.0000000  | 2.7294300  | 0.0000000 |
| H | 1.5185600  | 0.9677960  | 0.0000000 |
| F | 2.3637560  | 1.3647150  | 0.0000000 |
| H | 1.5185600  | -0.9677960 | 0.0000000 |
| F | 2.3637560  | -1.3647150 | 0.0000000 |
| H | 0.0000000  | -1.7956700 | 0.0000000 |
| F | 0.0000000  | -2.7294300 | 0.0000000 |
| H | -1.5185600 | -0.9677960 | 0.0000000 |
| F | -2.3637560 | -1.3647150 | 0.0000000 |
| H | -1.5185600 | 0.9677960  | 0.0000000 |
| F | -2.3637560 | 1.3647150  | 0.0000000 |

## Cryptolepines

| 31           |            |            |            |
|--------------|------------|------------|------------|
| Cryptolepine |            |            |            |
| C            | -4.0851940 | 1.2487790  | -0.1301040 |
| C            | -2.7175120 | 1.4555950  | -0.0971380 |
| C            | -1.8543350 | 0.3385730  | 0.0008640  |
| C            | -2.4314150 | -0.9679670 | 0.0244100  |
| C            | -3.8119100 | -1.1744780 | -0.0061530 |
| C            | -4.6265910 | -0.0530260 | -0.0765670 |
| C            | -0.4322550 | 0.1279040  | 0.0388840  |
| C            | -0.2028990 | -1.2897590 | 0.0517690  |
| N            | -1.4269230 | -1.9151230 | 0.0619400  |
| N            | 0.6239160  | 0.9771390  | 0.0790010  |
| C            | 1.9308300  | 0.4985970  | 0.0094550  |
| C            | 2.1610100  | -0.9170230 | 0.0154660  |
| C            | 1.0670690  | -1.8105380 | 0.0595290  |
| C            | 3.0366260  | 1.3749130  | -0.0751600 |
| C            | 4.3195320  | 0.8660990  | -0.1244720 |
| C            | 4.5591950  | -0.5254180 | -0.0894660 |
| C            | 3.4979590  | -1.3962420 | -0.0250280 |
| C            | 0.3784200  | 2.4221370  | 0.2426520  |
| H            | -4.7526310 | 2.1005230  | -0.2070780 |
| H            | -2.3363630 | 2.4663150  | -0.1716310 |
| H            | -4.2303890 | -2.1756420 | 0.0180040  |
| H            | -5.7042680 | -0.1813870 | -0.1031630 |
| H            | -1.5686250 | -2.9148030 | 0.0518010  |
| H            | 1.2451770  | -2.8817260 | 0.0843220  |
| H            | 2.8973130  | 2.4463000  | -0.1333130 |
| H            | 5.1564190  | 1.5532890  | -0.1992910 |
| H            | 5.5765310  | -0.9008160 | -0.1239700 |
| H            | 3.6602270  | -2.4699370 | -0.0113610 |
| H            | 1.1719620  | 2.8577600  | 0.8464580  |
| H            | -0.5575910 | 2.5555230  | 0.7785000  |
| H            | 0.3321070  | 2.9216120  | -0.7295000 |

| 35                      |            |            |            |
|-------------------------|------------|------------|------------|
| 7,9-dinitrocryptolepine |            |            |            |
| C                       | -4.0851940 | 1.2487790  | -0.1301040 |
| C                       | -2.7175120 | 1.4555950  | -0.0971380 |
| C                       | -1.8543350 | 0.3385730  | 0.0008640  |
| C                       | -2.4314150 | -0.9679670 | 0.0244100  |
| C                       | -3.8119100 | -1.1744780 | -0.0061530 |
| C                       | -4.6265910 | -0.0530260 | -0.0765670 |
| C                       | -0.4322550 | 0.1279040  | 0.0388840  |
| C                       | -0.2028990 | -1.2897590 | 0.0517690  |
| N                       | -1.4269230 | -1.9151230 | 0.0619400  |
| N                       | 0.6239160  | 0.9771390  | 0.0790010  |
| C                       | 1.9308300  | 0.4985970  | 0.0094550  |
| C                       | 2.1610100  | -0.9170230 | 0.0154660  |
| C                       | 1.0670690  | -1.8105380 | 0.0595290  |
| C                       | 3.0366260  | 1.3749130  | -0.0751600 |
| C                       | 4.3195320  | 0.8660990  | -0.1244720 |
| C                       | 4.5591950  | -0.5254180 | -0.0894660 |
| C                       | 3.4979590  | -1.3962420 | -0.0250280 |
| C                       | 0.3784200  | 2.4221370  | 0.2426520  |
| H                       | -2.3363630 | 2.4663150  | -0.1716310 |
| H                       | -5.7042680 | -0.1813870 | -0.1031630 |
| H                       | -1.5686250 | -2.9148030 | 0.0518010  |
| H                       | 1.2451770  | -2.8817260 | 0.0843220  |
| H                       | 2.8973130  | 2.4463000  | -0.1333130 |
| H                       | 5.1564190  | 1.5532890  | -0.1992910 |
| H                       | 5.5765310  | -0.9008160 | -0.1239700 |
| H                       | 0.3321070  | 2.9216120  | -0.7295000 |
| N                       | -4.4006470 | -2.5125350 | 0.0223250  |
| O                       | -3.6100730 | -3.4640800 | 0.0538300  |
| O                       | -5.6173340 | -2.6014560 | 0.0127730  |
| N                       | -4.9900390 | 2.4069760  | -0.2327380 |
| O                       | -4.4624490 | 3.5146470  | -0.2899590 |
| O                       | -6.1920440 | 2.1749510  | -0.2520070 |

| 8                                    |            |            |            |
|--------------------------------------|------------|------------|------------|
| 2 HNO2 as in 7,9-dinitrocryptolepine |            |            |            |
| H                                    | -3.9859750 | -1.5565220 | 0.0022130  |
| N                                    | -4.4006470 | -2.5125350 | 0.0223250  |
| O                                    | -3.6100730 | -3.4640800 | 0.0538300  |
| O                                    | -5.6173340 | -2.6014560 | 0.0127730  |
| H                                    | -4.3512610 | 1.5859850  | -0.1604170 |
| N                                    | -4.9900390 | 2.4069760  | -0.2327380 |
| O                                    | -4.4624490 | 3.5146470  | -0.2899590 |
| O                                    | -6.1920440 | 2.1749510  | -0.2520070 |

## Klärner Guest Molecules

|    |            |            |            |
|----|------------|------------|------------|
| 24 |            |            |            |
| AQ |            |            |            |
| C  | -3.6951200 | -0.6999450 | -0.0000010 |
| C  | -2.4906630 | -1.3980760 | -0.0000020 |
| C  | -1.2748940 | -0.7043870 | 0.0000030  |
| C  | -1.2748940 | 0.7043870  | 0.0000060  |
| C  | -2.4906630 | 1.3980760  | 0.0000070  |
| C  | -3.6951200 | 0.6999450  | 0.0000050  |
| C  | 0.0000000  | -1.4785380 | 0.0000050  |
| C  | 0.0000000  | 1.4785380  | -0.0000030 |
| C  | 1.2748940  | 0.7043870  | 0.0000000  |
| C  | 1.2748940  | -0.7043870 | -0.0000030 |
| C  | 2.4906630  | -1.3980760 | -0.0000030 |
| H  | 2.4645020  | -2.4827730 | -0.0000070 |
| C  | 3.6951200  | -0.6999450 | 0.0000030  |
| C  | 3.6951200  | 0.6999450  | 0.0000050  |
| C  | 2.4906630  | 1.3980760  | 0.0000040  |
| H  | -4.6361860 | -1.2430060 | -0.0000020 |
| H  | -2.4645020 | -2.4827730 | -0.0000080 |
| H  | -2.4645020 | 2.4827730  | 0.0000090  |
| H  | -4.6361860 | 1.2430060  | 0.0000050  |
| H  | 4.6361860  | -1.2430060 | 0.0000090  |
| H  | 4.6361860  | 1.2430060  | 0.0000050  |
| H  | 2.4645020  | 2.4827730  | 0.0000040  |
| O  | 0.0000000  | 2.7050370  | -0.0000150 |
| O  | 0.0000000  | -2.7050370 | -0.0000060 |

28

|          |            |            |            |
|----------|------------|------------|------------|
| 1,5-DNAQ |            |            |            |
| C        | -3.6951200 | -0.6999450 | -0.0000010 |
| C        | -2.4906630 | -1.3980760 | -0.0000020 |
| C        | -1.2748940 | -0.7043870 | 0.0000030  |
| C        | -1.2748940 | 0.7043870  | 0.0000060  |
| C        | -2.4906630 | 1.3980760  | 0.0000070  |
| C        | -3.6951200 | 0.6999450  | 0.0000050  |
| C        | 0.0000000  | -1.4785380 | 0.0000050  |
| C        | 0.0000000  | 1.4785380  | -0.0000030 |
| C        | 1.2748940  | 0.7043870  | 0.0000000  |
| C        | 1.2748940  | -0.7043870 | -0.0000030 |
| C        | 2.4906630  | -1.3980760 | -0.0000030 |
| C        | 3.6951200  | -0.6999450 | 0.0000030  |
| C        | 3.6951200  | 0.6999450  | 0.0000050  |
| C        | 2.4906630  | 1.3980760  | 0.0000040  |
| H        | -4.6361860 | -1.2430060 | -0.0000020 |
| H        | -2.4645020 | -2.4827730 | -0.0000080 |
| H        | -4.6361860 | 1.2430060  | 0.0000050  |
| H        | 4.6361860  | -1.2430060 | 0.0000090  |
| H        | 4.6361860  | 1.2430060  | 0.0000050  |
| H        | 2.4645020  | 2.4827730  | 0.0000040  |
| O        | 0.0000000  | 2.7050370  | -0.0000150 |
| O        | 0.0000000  | -2.7050370 | -0.0000060 |
| N        | -2.5918730 | 2.8734850  | -0.0004490 |
| O        | -2.6772980 | 3.4139190  | -1.0953680 |
| O        | -2.6787400 | 3.4144920  | 1.0941290  |
| N        | 2.5918770  | -2.8734780 | -0.0000660 |
| O        | 2.6777980  | -3.4141570 | -1.0948430 |
| O        | 2.6781970  | -3.4142470 | 1.0946560  |

8

|                       |            |            |            |
|-----------------------|------------|------------|------------|
| 2 HNO2 as in 1,5-DNAQ |            |            |            |
| H                     | -2.4288760 | 1.8426530  | -0.0000620 |
| N                     | -2.5918730 | 2.8734850  | -0.0004490 |
| O                     | -2.6772980 | 3.4139190  | -1.0953680 |
| O                     | -2.6787400 | 3.4144920  | 1.0941290  |
| H                     | 2.4289280  | -1.8426390 | 0.0000100  |
| N                     | 2.5918770  | -2.8734780 | -0.0000660 |
| O                     | 2.6777980  | -3.4141570 | -1.0948430 |
| O                     | 2.6781970  | -3.4142470 | 1.0946560  |

28

1,8-DNAQ

|   |            |            |            |
|---|------------|------------|------------|
| C | -3.6951200 | -0.6999450 | -0.0000010 |
| C | -2.4906630 | -1.3980760 | -0.0000020 |
| C | -1.2748940 | -0.7043870 | 0.0000030  |
| C | -1.2748940 | 0.7043870  | 0.0000060  |
| C | -2.4906630 | 1.3980760  | 0.0000070  |
| C | -3.6951200 | 0.6999450  | 0.0000050  |
| C | 0.0000000  | -1.4785380 | 0.0000050  |
| C | 0.0000000  | 1.4785380  | -0.0000030 |
| C | 1.2748940  | 0.7043870  | 0.0000000  |
| C | 1.2748940  | -0.7043870 | -0.0000030 |
| C | 2.4906630  | -1.3980760 | -0.0000030 |
| C | 3.6951200  | -0.6999450 | 0.0000030  |
| C | 3.6951200  | 0.6999450  | 0.0000050  |
| C | 2.4906630  | 1.3980760  | 0.0000040  |
| H | -4.6361860 | -1.2430060 | -0.0000020 |
| H | -2.4645020 | 2.4827730  | 0.0000090  |
| H | -4.6361860 | 1.2430060  | 0.0000050  |
| H | 4.6361860  | -1.2430060 | 0.0000090  |
| H | 4.6361860  | 1.2430060  | 0.0000050  |
| H | 2.4645020  | 2.4827730  | 0.0000040  |
| O | 0.0000000  | 2.7050370  | -0.0000150 |
| O | 0.0000000  | -2.7050370 | -0.0000060 |
| N | -2.5947380 | -2.8735390 | -0.0000040 |
| N | 2.5947380  | -2.8735390 | -0.0000050 |
| O | -2.6828410 | -3.4127020 | -1.0950640 |
| O | 2.6828110  | -3.4127090 | 1.0950540  |
| O | -2.6828860 | -3.4127010 | 1.0950530  |
| O | 2.6828480  | -3.4127020 | -1.0950650 |

8

2 HNO2 as in 1,8-DNAQ

|   |            |            |            |
|---|------------|------------|------------|
| H | -2.4275040 | -1.8432920 | -0.0000010 |
| N | -2.5947380 | -2.8735390 | -0.0000040 |
| O | -2.6828410 | -3.4127020 | -1.0950640 |
| O | -2.6828860 | -3.4127010 | 1.0950530  |
| H | 4.587438   | -3.483298  | -0.000009  |
| N | 4.903344   | -5.430202  | -0.000009  |
| O | 5.069778   | -6.449085  | 2.069352   |
| O | 5.069848   | -6.449072  | -2.069373  |

26

dicyanomethylene fluorene

|   |            |            |            |
|---|------------|------------|------------|
| C | -3.0084510 | -2.2791450 | 0.0000010  |
| C | -1.6371320 | -2.5650480 | 0.0000000  |
| C | -0.7347360 | -1.5101490 | -0.0000010 |
| C | -1.1854220 | -0.1662590 | -0.0000020 |
| C | -2.5546170 | 0.1100920  | 0.0000000  |
| C | -3.4593580 | -0.9579810 | 0.0000010  |
| H | -3.7266330 | -3.0943210 | 0.0000030  |
| H | -2.9299840 | 1.1255280  | -0.0000010 |
| C | 0.7347570  | -1.5101390 | -0.0000010 |
| C | 1.6371660  | -2.5650270 | 0.0000000  |
| C | 1.1854250  | -0.1662440 | -0.0000020 |
| C | 3.0084800  | -2.2791080 | 0.0000010  |
| H | 1.2912990  | -3.5949720 | 0.0000010  |
| C | 2.5546170  | 0.1101240  | 0.0000000  |
| C | 3.4593710  | -0.9579370 | 0.0000010  |
| H | 3.7266730  | -3.0942740 | 0.0000030  |
| H | 2.9299720  | 1.1255650  | -0.0000010 |
| C | -0.0000040 | 0.7196190  | -0.0000040 |
| C | -0.0000140 | 2.0942990  | -0.0000030 |
| C | -1.1965140 | 2.8790730  | -0.0000010 |
| C | 1.1964750  | 2.8790910  | -0.0000010 |
| N | -2.1521950 | 3.5440190  | 0.0000030  |
| N | 2.1521460  | 3.5440510  | 0.0000030  |
| H | -4.5251380 | -0.7503250 | 0.0000020  |
| H | -1.2912520 | -3.5949880 | 0.0000010  |
| H | 4.5251480  | -0.7502680 | 0.0000020  |

32

TNF

|   |            |            |            |
|---|------------|------------|------------|
| C | -3.0084510 | -2.2791450 | 0.0000010  |
| C | -1.6371320 | -2.5650480 | 0.0000000  |
| C | -0.7347360 | -1.5101490 | -0.0000010 |
| C | -1.1854220 | -0.1662590 | -0.0000020 |
| C | -2.5546170 | 0.1100920  | 0.0000000  |
| C | -3.4593580 | -0.9579810 | 0.0000010  |
| H | -3.7266330 | -3.0943210 | 0.0000030  |
| H | -2.9299840 | 1.1255280  | -0.0000010 |
| C | 0.7347570  | -1.5101390 | -0.0000010 |
| C | 1.6371660  | -2.5650270 | 0.0000000  |
| C | 1.1854250  | -0.1662440 | -0.0000020 |
| C | 3.0084800  | -2.2791080 | 0.0000010  |
| H | 1.2912990  | -3.5949720 | 0.0000010  |
| C | 2.5546170  | 0.1101240  | 0.0000000  |
| C | 3.4593710  | -0.9579370 | 0.0000010  |
| H | 3.7266730  | -3.0942740 | 0.0000030  |
| H | 2.9299720  | 1.1255650  | -0.0000010 |
| C | -0.0000040 | 0.7196190  | -0.0000040 |
| C | -0.0000140 | 2.0942990  | -0.0000030 |
| C | -1.1965140 | 2.8790730  | -0.0000010 |
| C | 1.1964750  | 2.8790910  | -0.0000010 |
| N | -2.1521950 | 3.5440190  | 0.0000030  |
| N | 2.1521460  | 3.5440510  | 0.0000030  |
| N | -4.9061000 | -0.6903450 | 0.0086310  |
| O | -5.2570680 | 0.4854540  | -0.0133760 |
| O | -5.6566790 | -1.6623160 | 0.0370050  |
| N | -1.2987370 | -3.9955730 | 0.0635060  |
| O | -0.4607670 | -4.3479080 | 0.8916720  |
| O | -1.9222990 | -4.7405630 | -0.6832700 |
| N | 4.9044340  | -0.6797510 | 0.0014410  |
| O | 5.2522340  | 0.4980270  | -0.0012060 |
| O | 5.6627760  | -1.6469320 | 0.0037160  |

12

3 HNO2 as in TNF

|   |            |            |            |
|---|------------|------------|------------|
| H | -3.8814950 | -0.8809970 | 0.0026250  |
| N | -4.9061000 | -0.6903450 | 0.0086310  |
| O | -5.2570680 | 0.4854540  | -0.0133760 |
| O | -5.6566790 | -1.6623160 | 0.0370050  |
| H | -1.4952280 | -2.9745670 | -0.0071440 |
| N | -1.2987370 | -3.9955730 | 0.0635060  |
| O | -0.4607670 | -4.3479080 | 0.8916720  |
| O | -1.9222990 | -4.7405630 | -0.6832700 |
| H | 3.8810200  | -0.8759160 | 0.0010000  |
| N | 4.9044340  | -0.6797510 | 0.0014410  |
| O | 5.2522340  | 0.4980270  | -0.0012060 |
| O | 5.6627760  | -1.6469320 | 0.0037160  |



## Supramolecular Synthons

48

1,3,5-trisphenethynylbenzene

|   |            |            |           |
|---|------------|------------|-----------|
| C | 1.2214360  | 0.7051960  | 0.0000000 |
| C | 0.0000000  | 1.4008080  | 0.0000000 |
| C | -1.2214360 | 0.7051960  | 0.0000000 |
| C | -1.2131350 | -0.7004040 | 0.0000000 |
| C | 0.0000000  | -1.4103920 | 0.0000000 |
| C | 1.2131350  | -0.7004040 | 0.0000000 |
| H | 0.0000000  | 2.4851080  | 0.0000000 |
| H | -2.1521670 | -1.2425540 | 0.0000000 |
| H | 2.1521670  | -1.2425540 | 0.0000000 |
| C | -2.4556780 | 1.4177860  | 0.0000000 |
| C | -3.5087850 | 2.0257980  | 0.0000000 |
| C | 2.4556780  | 1.4177860  | 0.0000000 |
| C | 3.5087850  | 2.0257980  | 0.0000000 |
| C | 0.0000000  | -2.8355730 | 0.0000000 |
| C | 0.0000000  | -4.0515960 | 0.0000000 |
| C | 0.0000000  | -5.4768070 | 0.0000000 |
| C | 1.2135770  | -6.1935190 | 0.0000000 |
| C | -1.2135770 | -6.1935190 | 0.0000000 |
| H | -2.1509090 | -5.6456910 | 0.0000000 |
| C | -1.2087730 | -7.5857460 | 0.0000000 |
| C | 1.2087730  | -7.5857460 | 0.0000000 |
| H | 2.1510910  | -8.1270370 | 0.0000000 |
| C | 0.0000000  | -8.2866830 | 0.0000000 |
| H | 0.0000000  | -9.3731680 | 0.0000000 |
| H | 2.1509090  | -5.6456910 | 0.0000000 |
| H | -2.1510910 | -8.1270370 | 0.0000000 |
| C | 4.7430540  | 2.7384030  | 0.0000000 |
| C | 4.7569560  | 4.1477480  | 0.0000000 |
| H | 3.8138570  | 4.6855870  | 0.0000000 |
| C | 5.9650620  | 4.8397010  | 0.0000000 |
| C | 5.9705330  | 2.0457710  | 0.0000000 |
| C | 7.1738350  | 2.7460450  | 0.0000000 |
| H | 8.1137660  | 2.2006190  | 0.0000000 |
| C | -4.7430540 | 2.7384030  | 0.0000000 |
| C | -5.9705330 | 2.0457710  | 0.0000000 |
| H | -5.9647660 | 0.9601030  | 0.0000000 |
| C | -7.1738350 | 2.7460450  | 0.0000000 |
| C | -7.1764780 | 4.1433410  | 0.0000000 |
| H | -8.1174020 | 4.6865840  | 0.0000000 |
| C | -5.9650620 | 4.8397010  | 0.0000000 |
| H | -5.9626750 | 5.9264180  | 0.0000000 |
| C | -4.7569560 | 4.1477480  | 0.0000000 |
| C | 7.1764780  | 4.1433410  | 0.0000000 |
| H | 8.1174020  | 4.6865840  | 0.0000000 |
| H | 5.9647660  | 0.9601030  | 0.0000000 |
| H | 5.9626750  | 5.9264180  | 0.0000000 |
| H | -3.8138570 | 4.6855870  | 0.0000000 |
| H | -8.1137660 | 2.2006190  | 0.0000000 |

48

1,3,5-tris(perfluorophenethynyl)benzene

|   |            |            |           |
|---|------------|------------|-----------|
| C | 1.2214360  | 0.7051960  | 0.0000000 |
| C | 0.0000000  | 1.4008080  | 0.0000000 |
| C | -1.2214360 | 0.7051960  | 0.0000000 |
| C | -1.2131350 | -0.7004040 | 0.0000000 |
| C | 0.0000000  | -1.4103920 | 0.0000000 |
| C | 1.2131350  | -0.7004040 | 0.0000000 |
| H | 0.0000000  | 2.4851080  | 0.0000000 |
| H | -2.1521670 | -1.2425540 | 0.0000000 |
| H | 2.1521670  | -1.2425540 | 0.0000000 |
| C | -2.4556780 | 1.4177860  | 0.0000000 |
| C | -3.5087850 | 2.0257980  | 0.0000000 |
| C | 2.4556780  | 1.4177860  | 0.0000000 |
| C | 3.5087850  | 2.0257980  | 0.0000000 |
| C | 0.0000000  | -2.8355730 | 0.0000000 |
| C | 0.0000000  | -4.0515960 | 0.0000000 |
| C | 0.0000000  | -5.4768070 | 0.0000000 |
| C | 1.2135770  | -6.1935190 | 0.0000000 |
| C | -1.2135770 | -6.1935190 | 0.0000000 |
| C | -1.2087730 | -7.5857460 | 0.0000000 |
| C | 1.2087730  | -7.5857460 | 0.0000000 |
| C | 0.0000000  | -8.2866830 | 0.0000000 |
| C | 4.7430540  | 2.7384030  | 0.0000000 |
| C | 4.7569560  | 4.1477480  | 0.0000000 |
| C | 5.9650620  | 4.8397010  | 0.0000000 |
| C | 5.9705330  | 2.0457710  | 0.0000000 |
| C | 7.1738350  | 2.7460450  | 0.0000000 |
| C | -4.7430540 | 2.7384030  | 0.0000000 |
| C | -5.9705330 | 2.0457710  | 0.0000000 |
| C | -7.1738350 | 2.7460450  | 0.0000000 |
| C | -7.1764780 | 4.1433410  | 0.0000000 |
| C | -5.9650620 | 4.8397010  | 0.0000000 |
| C | -4.7569560 | 4.1477480  | 0.0000000 |
| C | 7.1764780  | 4.1433410  | 0.0000000 |
| F | -2.3774360 | -5.5431240 | 0.0000000 |
| F | 2.3621150  | -8.2634150 | 0.0000000 |
| F | 0.0000000  | -9.6193530 | 0.0000000 |
| F | 2.3774360  | -5.5431240 | 0.0000000 |
| F | -2.3621150 | -8.2634150 | 0.0000000 |
| F | 3.6114280  | 4.8299370  | 0.0000000 |
| F | 8.3380430  | 2.0872430  | 0.0000000 |
| F | -5.9888690 | 0.7125960  | 0.0000000 |
| F | -8.3308700 | 4.8090200  | 0.0000000 |
| F | -5.9759560 | 6.1774380  | 0.0000000 |
| F | 8.3308700  | 4.8090200  | 0.0000000 |
| F | 5.9888690  | 0.7125960  | 0.0000000 |
| F | 5.9759560  | 6.1774380  | 0.0000000 |
| F | -3.6114280 | 4.8299370  | 0.0000000 |
| F | -8.3380430 | 2.0872430  | 0.0000000 |

30

15 HF as in 1,3,5-tris(perfluorophenethynyl)benzene

|   |            |            |           |
|---|------------|------------|-----------|
| H | 5.9791210  | 1.6462090  | 0.0000000 |
| F | 5.9888690  | 0.7125960  | 0.0000000 |
| H | -5.9791210 | 1.6462090  | 0.0000000 |
| F | -5.9888690 | 0.7125960  | 0.0000000 |
| H | 1.5536710  | -7.7960850 | 0.0000000 |
| F | 2.3621150  | -8.2634150 | 0.0000000 |
| H | -7.5086320 | 4.3672340  | 0.0000000 |
| F | -8.3308700 | 4.8090200  | 0.0000000 |
| H | -5.9684500 | 5.2436670  | 0.0000000 |
| F | -5.9759560 | 6.1774380  | 0.0000000 |
| H | -4.4157330 | 4.3557860  | 0.0000000 |
| F | -3.6114280 | 4.8299370  | 0.0000000 |
| H | 1.5586040  | -5.9917360 | 0.0000000 |
| F | 2.3774360  | -5.5431240 | 0.0000000 |
| H | -7.5211460 | 2.5396380  | 0.0000000 |
| F | -8.3380430 | 2.0872430  | 0.0000000 |
| H | 0.0000000  | -8.6859510 | 0.0000000 |
| F | 0.0000000  | -9.6193530 | 0.0000000 |
| H | -1.5536710 | -7.7960850 | 0.0000000 |
| F | -2.3621150 | -8.2634150 | 0.0000000 |
| H | -1.5586040 | -5.9917360 | 0.0000000 |
| F | -2.3774360 | -5.5431240 | 0.0000000 |
| H | 4.4157330  | 4.3557860  | 0.0000000 |
| F | 3.6114280  | 4.8299370  | 0.0000000 |
| H | 5.9684500  | 5.2436670  | 0.0000000 |
| F | 5.9759560  | 6.1774380  | 0.0000000 |
| H | 7.5086320  | 4.3672340  | 0.0000000 |
| F | 8.3308700  | 4.8090200  | 0.0000000 |
| H | 7.5211460  | 2.5396380  | 0.0000000 |
| F | 8.3380430  | 2.0872430  | 0.0000000 |
